# Supplementary material for: The impact of contour maps on estimating the risk of gastrointestinal stromal tumor recurrence: indications for adjuvant therapy: an analysis of the Kinki GIST registry
Source: Springer Nature journal article supplement (doi:10.1007/s10120-023-01444-8), 2023-12-25
Supplement: MOESM3 [file 26563890]

---

**Online resource. 3 The cause of death in each modified NIHC groups**

---

| Modified NIHC | Primary disease (N, %) | Other diseases (N, %) |
|---------------|------------------------|-----------------------|
| Very low      | 3 (7.9%)               | 35 (92.1%)            |
| Low           | 3 (6.7%)               | 42 (93.3%)            |
| Intermediate  | 1 (8.3%)               | 11 (91.7%)            |
| High          | 30 (60.0%)             | 20 (40.0%)            |

---

NIHC; The National Institutes of Health consensus criteria

---
